# Supplementary material
Source: PubMed Central journal article supplement (PMC518841)
Supplement: pnas_101_38_13832__1.pdf [file pnas_101_38_13832__1.pdf]

**Table 1. Attenuated *Listeria monocytogenes* strains platform strains**

| Strain                 | Genotype                                      | Phenotype                                                                             | Pathogenicity in C57BL/6 mice LD <sub>50</sub> ,* cfu | Pathogenicity in Balb/c mice LD <sub>50</sub> ,† cfu | Log attenuation‡ | OVA-specific CD8 <sup>+</sup> T cells,§ % | Log protection¶ | Ref. |
|------------------------|-----------------------------------------------|---------------------------------------------------------------------------------------|-------------------------------------------------------|------------------------------------------------------|------------------|-------------------------------------------|-----------------|------|
| DP-L4056               | Wt; 10403S, phage free                        | Wild-type                                                                             | 1 × 10 <sup>5</sup>                                   | 5 × 10 <sup>4</sup>                                  | —                | 2.96 ± 1.5                                | 4.86 ± 0.01     | 1    |
| DP-L4056 (Heat killed) | Wt; 10403S, phage free                        | Wild-type                                                                             | 1 × 10 <sup>10</sup>                                  | ND                                                   | 5.0              | 0.03 ± 0.0                                | -0.76 ± 0.46    | 2    |
| Single mutants         |                                               |                                                                                       |                                                       |                                                      |                  |                                           |                 |      |
| DP-L4027               | <i>hly</i> ( $\Delta$ LLO)                    | Defective phagolysosome release                                                       | 2 × 10 <sup>9</sup>                                   | 1 × 10 <sup>9</sup>                                  | 4.3              | 2.85 ± 0.9                                | 1.74 ± 0.26     | 3    |
| DP-L4029               | $\Delta$ <i>actA</i>                          | No host actin nucleation; defective cell-to-cell spread                               | 1 × 10 <sup>8</sup>                                   | 1 × 10 <sup>8</sup>                                  | 3.0              | 8.57 ± 1.4                                | 4.29 ± 0.31     | 4    |
| DP-L4017               | LLO L461T                                     | Cytotoxic; constitutive LLO activity at physiologic pH; defective cell-to-cell spread | 1 × 10 <sup>7</sup>                                   | ND                                                   | 2.0              | 7.28 ± 1.3                                | 4.73 ± 0.16     | 5    |
| DP-L4042               | LLO $\Delta$ 26 ( $\Delta$ PEST)              | Cytotoxic; defective cell-to-cell spread                                              | 6 × 10 <sup>8</sup>                                   | ND                                                   | 3.8              | 2.87 ± 2.1                                | 0.80 ± 0.11     | 6    |
| DP-L4097               | LLO S44A                                      | Cytotoxic; defective cell-to-cell spread                                              | 7.5 × 10 <sup>7</sup>                                 | ND                                                   | 2.9              | 3.60 ± 1.6                                | 2.22 ± 0.41     | 7    |
| DP-L4364               | $\Delta$ <i>lplA</i> (lipoate protein ligase) | Abortive infection; limited ability to proliferate intracellularly                    | 1 × 10 <sup>8</sup>                                   | 5 × 10 <sup>6</sup>                                  | 3.0              | 3.01 ± 1.2                                | 3.28 ± 0.17     | 8    |
| DP-L4405               | $\Delta$ <i>inlA</i>                          | Impaired InlA-mediated infection                                                      | 1 × 10 <sup>5</sup>                                   | ND                                                   | 0                | 3.56 ± 1.1                                | ND              | 9    |
| DP-L4406               | $\Delta$ <i>inlB</i>                          | Impaired InlB-mediated infection                                                      | 1 × 10 <sup>5</sup>                                   | ND                                                   | 0                | 3.11 ± 0.3                                | 4.18 ± 0.37     | 9    |
| Double mutants         |                                               |                                                                                       |                                                       |                                                      |                  |                                           |                 |      |

| Strain   | Genotype            | Phenotype                                                                     | Pathogenicity in C57BL/6 mice LD <sub>50</sub> ,* cfu | Pathogenicity in Balb/c mice LD <sub>50</sub> ,† cfu | Log attenuation‡ | OVA-specific CD8 <sup>+</sup> T cells,§ % | Log protection¶ | Ref.       |
|----------|---------------------|-------------------------------------------------------------------------------|-------------------------------------------------------|------------------------------------------------------|------------------|-------------------------------------------|-----------------|------------|
| CS-L0001 | <i>ΔactA/ΔinlB</i>  | No host actin nucleation; defective cell-to-cell spread                       | 1 × 10 <sup>8</sup> –5 × 10 <sup>8</sup>              | 1 × 10 <sup>8</sup>                                  | 3.0              | 8.36 ± 1.2                                | 4.86 ± 0.00     | This study |
| CS-L0002 | <i>ΔactA/ΔlplA</i>  | No host actin nucleation; defective cell-to-cell spread                       | 1 × 10 <sup>9</sup>                                   | ND                                                   | 4.0              | 3.00 ± 1.3                                | 4.86 ± 0.00     | This study |
| CS-L0003 | L461T/ <i>ΔlplA</i> | Cytotoxic; Abortive infection; limited ability to proliferate intracellularly | 1 × 10 <sup>9</sup>                                   | ND                                                   | 4.0              | ND                                        | 4.86 ± 0.00     | This study |
| DP-L4038 | <i>ΔactA/L461T</i>  | Cytotoxic; defective cell-to-cell spread                                      | 3 × 10 <sup>9</sup>                                   | ND                                                   | 4.5              | 3.31 ± 0.6                                | 3.56 ± 0.33     | 7          |
| DP-L4384 | LLO S44A/L461T      | Cytotoxic; defective cell-to-cell spread                                      | 1 × 10 <sup>8</sup>                                   | ND                                                   | 3.0              | 2.49 ± 1.5                                | 0.66 ± 0.33     | 7          |

LLO, listeriolysin O; ND, not determined; —, not applicable.

\*Pathogenicity in female C57BL/6 mice was determined of the indicated parental strain. Three to five mice were infected i.v. with 5-fold dilutions starting at 1 × 10<sup>9</sup> colony-forming units (cfu) of the indicated strain. Survival was monitored over 10 days and the LD<sub>50</sub> was calculated. The recombinant ovalbumin (OVA)-expressing strains were shown to have an LD<sub>50</sub> that was within a factor of five of the unmodified parent strains (data not shown).

†Pathogenicity in female Balb/c mice was determined with serial 5-fold dilutions of the indicated parental strain.

‡Log attenuation is calculated based on the LD<sub>50</sub> for the indicated strain compared with wild-type *Listeria* in C57BL/6 mice.

§The percent OVA-specific CD8<sup>+</sup> T cells was determined 7 days after immunization in C57BL/6 mice vaccinated i.v. with a dose equal to 0.1 LD<sub>50</sub> of the indicated *Listeria* OVA strain. OVA-specific IFN-γ secreting CD8<sup>+</sup> T cells were determined by intracellular cytokine staining. The average of at least three independent experiments is shown.

¶Log protection is calculated based on the difference between cfu per spleen of naïve and *Listeria*-vaccinated C57BL/6 mice. Female C57BL/6 mice were vaccinated with 0.1 LD<sub>50</sub> of the indicated attenuated *Listeria* strains. Wild-type *Listeria* served as positive control and heat-killed *Listeria* (wt) as negative control. Vaccinated mice are

challenged with a  $2 \times LD_{50}$  28 days post the primary vaccination. Spleens were harvested 72 h post challenge and homogenized in PBS/0.5% Triton-X100 to determine CFU per organ. Limit of detection (LOD) is 50 CFU per organ. The presented data are combined from two independent experiments.

1. Bishop, D. K. & Hinrichs, D. J. (1987) *J. Immunol.* **139**, 2005–2009.
2. Lauvau, G., Vijh, S., Kong, P., Horng, T., Kerksiek, K., Serbina, N., Tuma, R. A. & Pamer, E. G. (2001) *Science* **294**, 1735–1759.
3. Jones, S. & Portnoy, D. A. (1994) *Infect. Immun.* **62**, 5608–5613.
4. Camilli, A., Tilney, L. G. & Portnoy, D. A. (1993) *Mol. Microbiol.* **8**, 143–157.
5. Glomski, I. J., Gedde, M. M., Tsang, A. W., Swanson, J. A. & Portnoy, D. A. (2002) *J. Cell Biol.* **156**, 1029–1038.
6. Decatur, A. L. & Portnoy, D. A. (2000) *Science* **290**, 992–995.
7. Glomski, I. J., Decatur, A. L. & Portnoy, D. A. (2003) *Infect. Immun.* **71**, 6754–6765.
8. O’Riordan, M., Moors, M. A. & Portnoy, D. A. (2003) *Science* **302**, 462–464.
9. Bakardjiev, A. I., Stacy, B. A., Fisher, S. J. & Portnoy, D. A. (2004) *Infect. Immun.* **72**, 489–497.
