# Supplementary material
Source: PubMed Central journal article supplement (PMC518841)

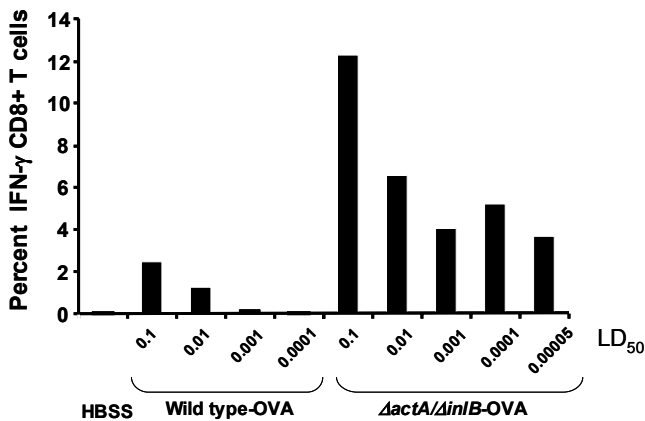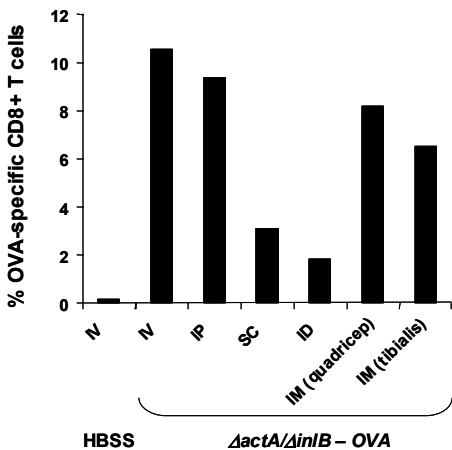

**Vaccination**

Supplement: pnas_101_38_13832__2.pdf [file pnas_101_38_13832__2.pdf]

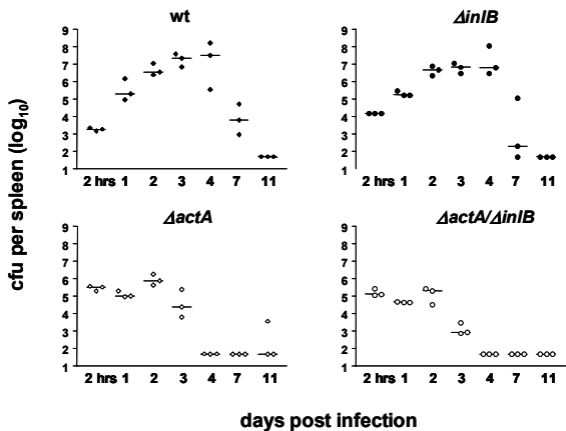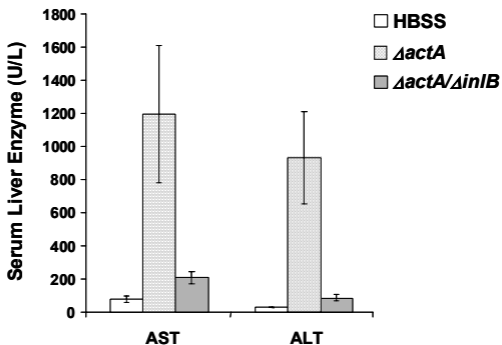

Supplement: pnas_101_38_13832__3.pdf [file pnas_101_38_13832__3.pdf]

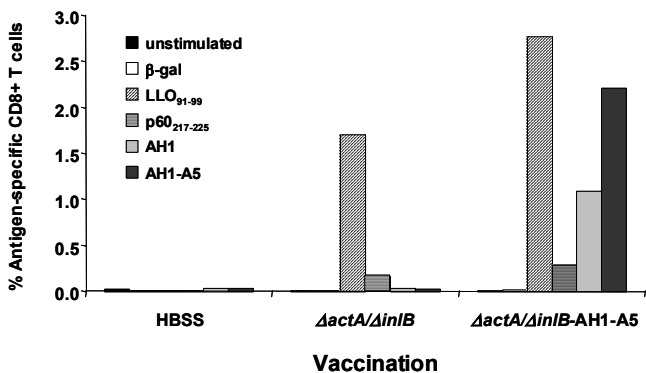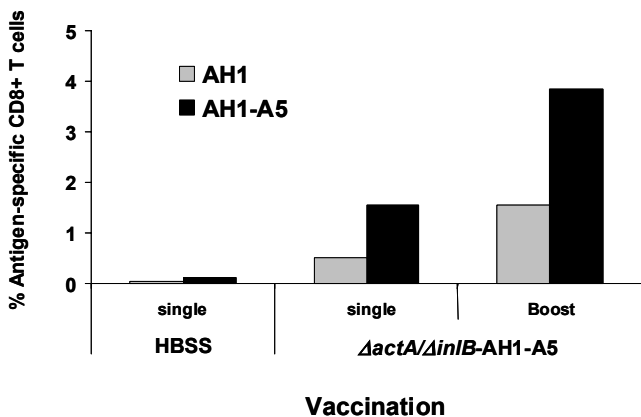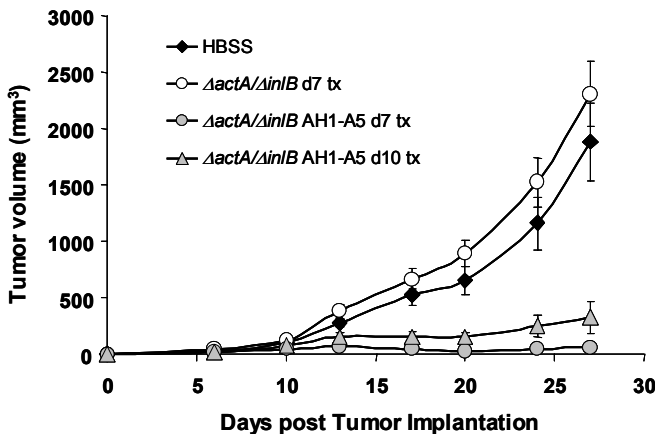

Supplement: pnas_101_38_13832__4.pdf [file pnas_101_38_13832__4.pdf]
